1  
2  
3  
4  
5  
6  
7  
8  
9  
10  
11  
12  
13  
14  
15

**Full title: Left-handedness is associated with greater fighting success in humans**

**Short title: Left-handedness and fighting SUCCESS**

**Thomas Richardson<sup>1\*</sup> & R. Tucker Gilman<sup>1</sup>**

**1 School of Earth and Environmental Sciences, University of Manchester,  
United Kingdom**

**\*corresponding author: [thomas.richardson@manchester.ac.uk](mailto:thomas.richardson@manchester.ac.uk)**

# 16 Left-handedness is associated with greater fighting 17 success in humans

## 18 Abstract

19 Left-handedness is a costly, sexually dimorphic trait found at low frequencies in all human  
20 populations. How the handedness polymorphism is maintained is unclear. The fighting hypothesis  
21 argues that left-handed men have a negative frequency-dependent advantage in violent  
22 intrasexual competition giving them a selective advantage. In support of this, many studies have  
23 found that left-handed men are overrepresented among modern professional fighters, but studies  
24 typically find no difference in fighting success between left and right-handed fighters. We studied  
25 over 13,800 professional boxers and mixed martial artists of varying abilities in three of the largest  
26 samples to test this hypothesis to date, finding robust evidence that left-handed fighters have  
27 greater fighting success. This held for both male and female fighters, and for both percentage of  
28 fights won and an objective measure of fighting ability. We replicated previous results showing that  
29 left-handed fighters are strongly overrepresented in professional combat sports, but left-handed  
30 fighters did not show greater variance in fighting ability, a hypothesis suggested in previous studies.  
31 Overall we find strong evidence consistent with the fighting hypothesis.

---

32 Keywords: Sexual-selection, Left-handedness, Fighting hypothesis, boxing, mixed martial arts,  
33

34

35

## 36 Introduction

37 Left-handedness is a cross-culturally universal, heritable phenotype in humans [1] that is thought to  
38 be associated with fitness costs ([2,3], reviewed in [4], but see [5]). Typically around 11% of the  
39 population is left-handed [6] and though exact numbers vary with culture [7], left-handers are  
40 always a minority. Since left-handedness is under direct negative selection, its persistence in  
41 humans is an evolutionary puzzle.

42

43 One explanation for the persistence of left-handedness is the fighting hypothesis [8]. This argues  
44 that the polymorphism in human handedness is maintained due to a negative frequency-dependent  
45 advantage that left-handedness confers to males in combat (see [9] for theoretical support, and [10]  
46 for a review of empirical evidence as well as alternatives). According to this theory, right-handed  
47 males lack experience fighting rare left-handed males, while left-handed males accumulate plenty  
48 of experience fighting right-handed males, putting them at a selective advantage. Combined with  
49 the intrinsic fitness costs of left-handedness, this would explain the universal pattern of low but  
50 stable levels of left-handers in all studied populations. There is mounting evidence that intrasexual  
51 contest competition such as fighting has been a key component of sexual selection on human  
52 males ([11,12] reviewed in [13 and 14]). Modern males may possess adaptations to assist them in  
53 fighting and assessing opponents' fighting ability [15]. Handedness could therefore be considered  
54 a sexually selected trait in males, and may be expressed in females a by-product [9].

55

56 Consistent with the fighting hypothesis, there is a wealth of evidence that left-handers are  
57 overrepresented in combat sports. Sports are particularly relevant systems for testing theories  
58 based on intrasexual competition, as they are thought to have evolved culturally as a display for  
59 males to advertise fighting and competitive ability [16]. Overrepresentation of left-handers has  
60 been seen in boxing [17-19], mixed martial arts or MMA [20-23], wrestling [24], Judo [25], and

61 Karate and Taekwondo [26]. Left-handers are also overrepresented in many other sports, though  
62 crucially only sports requiring direct interaction with an opponent [27,28]. As they are rare, left-  
63 handers may gain an advantage because their actions are more difficult to predict [29-31], perhaps  
64 due to attentional biases towards the right hand of an opponent [32], which in combat sports is  
65 typically used for power strikes. If left-handed men are disproportionately successful in combat  
66 sports when they are rare, it is not unreasonable to assume they would also be successful in  
67 ancestral environments where physical violence and competition were likely much more common  
68 than today [14].

69

70 Studies of the fighting hypothesis in martial artists typically do not find that left-handed fighters are  
71 more likely to win fights (e.g., [20], but see [19]). However, previous studies have often used small  
72 sample sizes (e.g. [17]) or only assessed the very best members of a particular sport (e.g., [19,  
73 24]). Any advantages are likely to be small as a large advantage would lead to an increase in the  
74 frequency of left-handed fighters until the advantage exactly offsets the costs of being left-handed,  
75 which may be small in populations with access to modern healthcare [2]. Thus, detecting the effect  
76 of left-handedness on fighting success may require very large sample sizes. Likewise, top fighters  
77 by definition have little variance in fight success, making detecting relationships in these datasets  
78 difficult. Top fighters may also have encountered enough left-handed opponents that any  
79 advantages due to unfamiliarity would be diminished. Evidence for whether left-handed fighters  
80 perform better than right-handed fighters is thus inconclusive. The present studies tested whether  
81 left-handed fighters are better than right-handed fighters in 3 large samples consisting of  
82 professional fighters at a variety of ability levels. In particular, one of our samples comprised the  
83 majority of boxers professionally active at the time of writing.

84

85 Previous studies also used win percentage records, number of wins, or ranking from a single  
86 tournament as proxies of fighting ability. These may fail to capture long term fighting performance,  
87 particularly for fighters with 0 losses, (which gives a win percentage of 1 regardless of the number  
88 of fights). These metrics also do not weight wins by quality of opponent, and fail to include how

89 fighters beat their opponent. For example, winning a boxing match by having a better judges' score  
90 after 10 rounds may indicate less physical dominance than a win by knockout in the first round. In  
91 our samples we excluded fighters who had few fights, and additionally compared left and right-  
92 handed boxers using their BoxRec score, a comprehensive measure of fighting ability that takes  
93 into account the type and swiftness of victory and opponent quality (see  
94 [http://boxrec.com/media/index.php/BoxRec\\_Ratings\\_Description](http://boxrec.com/media/index.php/BoxRec_Ratings_Description) for a description of how a BoxRec  
95 score is calculated).

96  
97 The fighting hypothesis for the evolution of left-handedness is based on male-male contest  
98 competition, but there is no reason to expect the frequency-dependent advantage of left-  
99 handedness in combat to be confined to males. However, there have been almost no of the  
100 success of left-handed female fighters. To remedy this, one of our samples consisted exclusively of  
101 female professional boxers and our sample of MMA fighters included women as well as men.  
102 Additionally, comparison of the left-hand advantage in male and female fighters allows us to  
103 investigate negative frequency-dependence. If there are fewer left-handed female fighters than  
104 male ones, the fighting hypothesis would predict left-handed female fighters would have a larger  
105 advantage.

106  
107 Lastly, a previous study by Dochtermann et al. [22] demonstrated that left-handed MMA fighters  
108 show greater variance in probability of winning a fight than right-handed fighters. They argue that  
109 this is because the advantage left-handed fighters possess increases the probability that they will  
110 reach professional level compared to right-handers even if they are less skilled. We attempted to  
111 replicate this finding in our samples.

112  
113 In summary, we investigated representation and fighting success of left-handers in 3 of the largest  
114 samples tested thus far, consisting of professional male and female boxers and MMA fighters of  
115 varying abilities. For boxers, we also tested the difference between left and right-handers in

116 BoxRec scores, a holistic measure of fighting ability. Our study provides one of the most powerful  
117 tests of the fighting hypothesis attempted to date.

118

## 119 Samples

120 Our first sample comprised every male professional boxer in the world listed as 'active' on  
121 [www.boxrec.com](http://www.boxrec.com) at the time of writing (January 2019). BoxRec.com is a community-run boxing  
122 website that aims to document the careers of every professional boxer to have ever taken part in a  
123 recorded match. Boxers are listed as active if they have fought in an officially licensed bout in the  
124 past 12 months. Our second sample comprised all professional female boxers listed on  
125 [www.boxrec.com](http://www.boxrec.com) for which stance data was available. For the female sample we included both  
126 active and retired boxers, as this ensured a large sample. Finally our third sample comprised all  
127 the MMA fighters listed on [ufcstats.com](http://ufcstats.com) at the time of writing. [ufcstats.com](http://ufcstats.com) is a comprehensive,  
128 respected MMA database that is the official statistics provider to the Ultimate Fighting  
129 Championship (UFC).

130

131 We excluded fighters with fewer than 5 fights, as their fight record is too preliminary to accurately  
132 reflect their fighting ability. We additionally excluded fighters with a win percentage of 20% or less.  
133 Many of these fighters are likely what are referred to in boxing slang as "tomato cans":  
134 uncompetitive fighters who take matches with opponents they have little chance of beating simply  
135 to earn money. They are often matched against young up-and-coming fighters in order to gain the  
136 fighter more wins on their record. For these reasons their win percentage and Boxrec score may  
137 not reflect their fighting ability, and as such they were excluded.

138

139 The final samples consisted of 10445 male boxers, (8666 right-handed and 1779 left-handed),  
140 1314 female boxers, (1150 right-handed and 164 left-handed fighters) and  
141 2100 MMA fighters (1707 right-handed and 393 left-handed fighters).

## 142 Results

143 All statistics were run in R [34], and all data and analysis code is available on the open science  
144 foundation (<https://osf.io/x3unr/>). For all samples, the number of fights left- and right-handed  
145 fighters had participated in, fighter ages, win percentages and BoxRec scores were all non-  
146 normally distributed, so nonparametric statistics were used throughout.

147  
148 A Mann-Whitney U test showed that left-handed male boxers did not differ in age ( $p = 0.88$ ) from  
149 right-handed boxers. For female fighters, age was not analysed as some boxers were retired,  
150 deceased or not currently active. Age was not available for the MMA fighters. Mann-Whitney U  
151 tests found no significant differences in number of fights between left- and right-handed fighters  
152 among male boxers ( $p = 0.40$ ) and female boxers ( $p = 0.69$ ) though left-handed MMA fighters did  
153 have marginally more fights than right-handed fighters ( $p = 0.047$ ). Additionally, t-tests showed that  
154 left- and right-handed MMA fighters did not differ in overall weight, height or arm length (also  
155 known as “reach”) (all  $p > 0.19$ ). This data was not available for either sample of boxers.

156

### 157 Are left-handers overrepresented among professional fighters?

158 To test whether left-handed fighters were overrepresented in our samples we ran three separate,  
159 one-tailed binomial tests against percentages of left-handers found in a large representative,  
160 western population [6]. We tested the percentage of left-handed male boxers against the  
161 percentage of left-handed men (12.6%) and female boxers against the percentage of left-handed  
162 women (9.9%) in the general population. The MMA sample included both male and female fighters,  
163 so was tested against the percentage of left-handed men, as this was the most conservative test of  
164 our hypothesis. Table 1 shows that left-handed fighters were significantly overrepresented in all  
165 three samples (all  $p \leq 0.001$ ).

166

---

**Table 1.** results of Binomial tests of % of left-handed fighters against % of left-handed people in

---

---

the general population

---

| <b>Sample</b> | <b>% left-handed fighters in sample</b> | <b>% left-handers in general population</b> | <b>p-value</b> |
|---------------|-----------------------------------------|---------------------------------------------|----------------|
| Male boxers   | 17.0                                    | 12.6                                        | < 0.0001       |
| Female boxers | 12.5                                    | 9.9                                         | = 0.001        |
| MMA fighters  | 18.7                                    | 12.6                                        | < 0.0001       |

---

167

168 Do left-handed fighters possess greater fighting ability than right-handed  
169 fighters?

170 We compared the fighting success of left- and right-handed fighters with one-tailed Mann-Whitney  
171 U tests. Each of the 3 samples was compared separately by win percentages, and the samples of  
172 male and female boxers were also compared by BoxRec scores. We calculated the measure of  
173 stochastic superiority [35,36] as an effect size for each comparison. The measure of stochastic  
174 superiority is the probability that a randomly selected left-handed fighter would have a higher win  
175 percentage/BoxRec score than a randomly selected right-handed fighter.

176

177 Among male boxers, the probability that a randomly selected left-handed fighter would have a  
178 higher BoxRec score than a randomly selected right-handed fighter was 52.4%, which a Mann-  
179 Whitney test showed was significant ( $p=0.00069$ ). The measure of stochastic superiority for win  
180 percentage was also 52.4%, which was also significant ( $p=0.0007$ ). Thus left-handed male boxers  
181 have significantly higher BoxRec scores and win percentages than right-handed male boxers.

182

183 Among female boxers, the probability that randomly selected left-hander showed a higher BoxRec  
184 score was 53.9%, which a Mann-Whitney test showed was marginally significant ( $p=0.053$ ). The  
185 measure of stochastic superiority for win percentage was 54.5%, which was significant ( $p=0.031$ ).  
186 Thus left-handed female boxers showed significantly higher BoxRec scores but not win  
187 percentages.

188



189 Among MMA fighters, the probability that a randomly sampled left-handed fighter showed a higher  
190 win percentage than a randomly selected right-handed fighter was 53.5%, which was significant  
191 ( $p=0.016$ ). A Spearman's correlation between total number of fights and win percentage revealed a  
192 negative correlation ( $r = -0.14$ ,  $p<0.0001$ ), indicating that this effect is not due to left-handed  
193 fighters having more fights. Thus left-handed MMA fighters showed significantly higher win  
194 percentages than right-handed MMA fighters.

195

196 **FIGURE 1 HERE**

197 *Figure 1: The probability that a randomly selected left-hander showed a higher (A) win percentage and (B)*  
198 *BoxRec score than a randomly selected right-hander. Boxes indicate 50% and whiskers indicate 90%*  
199 *bootstrapped confidence intervals (5000 samples).*

200

201 **Do left-handed fighters show greater variance than right-handed fighters?**

202 We compared the variance in BoxRec scores and win percentages among left- and right-handers  
203 by bootstrapping differences in variance (10,000 samples), with bias correction and acceleration  
204 following [37] to obtain robust p-values. All p-values are one-tailed. Left-handed male boxers  
205 showed higher variance in BoxRec scores ( $p = 0.002$ ) but not in win percentages ( $p = 0.74$ ). Left-  
206 handed female fighters did not differ from right-handed female fighters in the variance of their  
207 BoxRec scores ( $p = 0.80$ ) or win percentages ( $p = 0.77$ ). Likewise left-handed MMA fighters did not  
208 differ from right-handed MMA fighters in the variance of their win percentages ( $p = 0.54$ ).

209 **Does the left-hand advantage show negative frequency-dependence?**

210 The prevalence of left-handedness in female boxers was much lower than in male boxers (17% vs  
211 12.5%), while the magnitude of left-hand advantage in the BoxRec scores of female fighters was  
212 higher (54.5% vs 52.5%). If the advantage left-handed fighters have is negative frequency-  
213 dependent, then we might expect left-handed female boxers to have a relatively larger advantage  
214 than left-handed male boxers. To investigate this, we compared the measures of stochastic

215 superiority in the BoxRec scores of male and female boxers, and we bootstrapped a confidence  
216 interval around the difference (10,000 samples). The difference in the advantage of left-handed  
217 female and male boxers was not significantly different from 0 (bias corrected, accelerated  $p$ -value  
218 = 0.29). Thus, we have no evidence that female boxers experience a greater left-hand advantage  
219 than male boxers.

220

## 221 Discussion

222 Across three samples, we found that left-handed boxers and MMA fighters are both  
223 overrepresented in their respective sports and are more successful fighters. In male boxers, these  
224 effects held for both win percentages and BoxRec scores, where BoxRec scores are a more  
225 comprehensive measure of boxing ability. In female boxers we found that left-handed fighters  
226 showed higher BoxRec scores but not higher win percentages. Our results are consistent with the  
227 fighting hypothesis that left-handedness is maintained in populations because it provides a  
228 advantage in contest competition.

229

230 Our finding that left-handed fighters have better records than right-handed fighters in both male  
231 boxers and MMA fighters contrasts to most previous studies (e.g. [18,20,21], but see [19]). Two  
232 factors may have played a role. Firstly, the effect is small and may only be detectable in large  
233 samples such as ours. Second, it may not be detectable in datasets with low variance in fighting  
234 ability, such as when studies use samples of only elite fighters (e.g., [18]). The fact that we find  
235 similar results in both win percentages and BoxRec scores, which are a more complete measure of  
236 boxing ability, lead us to believe our results are robust.

237

238 Our positive finding for MMA fighters may be surprising, as a similar study [21] did not find a  
239 significant advantage of left-handedness in a sample approximately 70% of the size of ours. The  
240 study collected data from the same website we did ~6 years earlier, so its data set likely overlaps  
241 with ours. The different results may be due to the choice of analyses, or to the fact that the study

242 did not exclude fighters with few fights as we did. It is noteworthy that in [21], left-handed fighters  
243 had a non-significantly higher win percentage, so the trend reported is consistent with our results.

244

245 We found that left-handed female boxers showed better BoxRec scores than right-handed female  
246 boxers. As there were fewer left-handed fighters in the female sample than the male sample (12.6%  
247 to male's 17.3%), we tested whether the left-hand advantage seen in female fighters was higher  
248 than that of male fighters. Left-handed female fighters being less numerous and having greater  
249 success than their male counterparts would be consistent with the fighting hypothesis, in that it  
250 suggests a negative frequency-dependent advantage. However we did not find this. That the left-  
251 handed advantage in combat is negative frequency-dependent remains to be convincingly  
252 demonstrated, and is a crucial topic of future research. This might be investigated by comparing  
253 fighting leagues with varying levels of left-handers, or by testing whether increased contact with  
254 left-handed opponents over a fighter's career increases his/her probability of winning.

255

256 Unlike Dochtermann et al. [22], overall we found little evidence that left-handed fighters showed  
257 higher variance in fighting ability. Across all samples, only male left-handed boxers showed  
258 significantly higher variance, and then only in BoxRec scores. The difference in results could be  
259 attributed to the fact that Dochtermann et al. tested variance in the probability of a fighter to win a  
260 single given fight, whereas we examined variance in fighting success as measured by a fighter's  
261 record over their career thus far. It is possible that coaches (many of whom may suspect the  
262 existence of a left-handed advantage) or the left-handed fighters themselves adapt their training to  
263 compensate for their fighter's lower skills. However we warn that cross sectional data, such as  
264 ours and that of Dochtermann et al., are limited in their ability to answer this question. Longitudinal  
265 work that tracks whether left-handed amateurs are more likely to reach professional level  
266 regardless of initial skill would be valuable, and shed more light on this interesting hypothesis.

267

## 268 Conclusion

269 In conclusion, we present strong evidence that left-handed fighters show greater fighting success,  
270 consistent with the fighting hypothesis. Our study also provides further evidence that left-handed  
271 fighters are overrepresented in combat sports. We demonstrate these effects in 3 of the largest  
272 samples to test the hypothesis to date, using both male and female fighters, and using multiple  
273 measures of fighting competence. Future research linking fighting stance to fitness costs  
274 associated with handedness, as well as more direct work investigating the negative frequency-  
275 dependent nature of the left-hand advantage, is required.

## 276 Acknowledgements

277 We thank Rebecca Lewis and the other members of the Gilman lab for critical comments on the  
278 draft of this paper as well as the community of BoxRec.com and James Carr for insight into the  
279 world of boxing.

## 280 Data, code and materials

281 All data associated with this manuscript, as well as R code to conduct statistical analyses and  
282 create the graphs are uploaded as part of the supplementary material and can be additionally  
283 found at <https://osf.io/x3unr/>.

## 284 Funding

285 TR was supported by Engineering and Physical Sciences Research Council grant number  
286 EP/M506436

## 287 Author's contributions

288 TR conceived of and designed the study, obtained the data and wrote the manuscript. Both TR and  
289 RTG carried out statistical analysis. RTG critically revised the manuscript.

290

291

## 292 References

- 293 1. Medland SE, Duffy DL, Wright MJ, Geffen GM, Hay DA, Levy F, Van-Beijsterveldt CE,  
294 Willemsen G, Townsend GC, White V, Hewitt AW. Genetic influences on handedness: data  
295 from 25,732 Australian and Dutch twin families. *Neuropsychologia*. 2009 Jan 1;47(2):330-7
- 296 2. Coren S, Halpern DF. Left-handedness: a marker for decreased survival fitness. *Psychological*  
297 *bulletin*. 1991 Jan;109(1):90
- 298 3. Dragovic M, Hammond G. Handedness in schizophrenia: a quantitative review of evidence.  
299 *Acta Psychiatrica Scandinavica*. 2005 Jun;111(6):410-9
- 300 4. Llaurens V, Raymond M, Faurie C. Why are some people left-handed? An evolutionary  
301 perspective. *Philosophical Transactions of the Royal Society B: Biological Sciences*. 2008 Dec  
302 5;364(1519):881-94
- 303 5. Zickert N, Geuze RH, van der Feen FE, Groothuis TG. Fitness costs and benefits associated  
304 with hand preference in humans: A large internet study in a Dutch sample. *Evolution and*  
305 *Human Behavior*. 2018 Mar 1;39(2):235-48
- 306 6. Gilbert AN, Wysocki CJ. Hand preference and age in the United States. *Neuropsychologia*.  
307 1992 Jul 1;30(7):601-8
- 308 7. Raymond M, Pontier D. Is there geographical variation in human handedness?. *Laterality:*  
309 *Asymmetries of Body, Brain and Cognition*. 2004 Jan 1;9(1):35-51
- 310 8. Raymond M, Pontier D, Dufour AB, Møller AP. Frequency-dependent maintenance of left  
311 handedness in humans. *Proc. R. Soc. Lond. B*. 1996 Dec 22;263(1377):1627-33
- 312 9. Billiard S, Faurie C, Raymond M. Maintenance of handedness polymorphism in humans: a  
313 frequency-dependent selection model. *Journal of Theoretical Biology*. 2005 Jul 7;235(1):85-93
- 314 10. Groothuis TG, McManus IC, Schaafsma SM, Geuze RH. The fighting hypothesis in combat:  
315 how well does the fighting hypothesis explain human left-handed minorities?. *Annals of the*  
316 *New York Academy of Sciences*. 2013 Jun 1;1288(1):100-9
- 317 11. Hill AK, Hunt J, Welling LL, Cárdenas RA, Rotella MA, Wheatley JR, Dawood K, Shriver MD,  
318 Puts DA. Quantifying the strength and form of sexual selection on men's traits. *Evolution and*  
319 *Human Behavior*. 2013 Sep 1;34(5):334-41

- 320 12. Kordsmeyer TL, Hunt J, Puts DA, Ostner J, Penke L. The relative importance of intra-and  
321 intersexual selection on human male sexually dimorphic traits. *Evolution and Human Behavior*.  
322 2018 Jul 1;39(4):424-36
- 323 13. Puts DA, Jones BC, DeBruine LM. Sexual selection on human faces and voices. *Journal of sex*  
324 *research*. 2012 Mar 1;49(2-3):227-43
- 325 14. Puts DA. Beauty and the beast: Mechanisms of sexual selection in humans. *Evolution and*  
326 *Human Behavior*. 2010 May 1;31(3):157-75
- 327 15. Třebický V, Stirrat M, Havlíček J. Fighting Assessment. In: T. K. Shackelford, V. A. Weekes-  
328 Shackelford (eds.), *Encyclopedia of Evolutionary Psychological Science Switzerland: Springer*  
329 *Nature* p. 1-11
- 330 16. Deaner RO, Balish SM, Lombardo MP. Sex differences in sports interest and motivation: An  
331 evolutionary perspective. *Evolutionary Behavioral Sciences*. 2016 Apr;10(2):73
- 332 17. Gursoy R. Effects of left-or right-hand preference on the success of boxers in Turkey. *British*  
333 *Journal of Sports Medicine*. 2009 Feb 1;43(2):142-4
- 334 18. Sorokowski P, Sabiniewicz A, Waciewicz S. The influence of the boxing stance on performance  
335 in professional boxers. *AnthropologicAI review*. 2014 Dec 1;77(3):347-53
- 336 19. Loffing F, Hagemann N. Pushing through evolution? Incidence and fight records of left-oriented  
337 fighters in professional boxing history. *Laterality: Asymmetries of Body, Brain and []Cognition*.  
338 2015 May 4;20(3):270-86
- 339 20. Pollet TV, Stulp G, Groothuis TG. Born to win? Testing the fighting hypothesis in realistic fights:  
340 left-handedness in the Ultimate Fighting Championship. *Animal behaviour*. 2013 Oct  
341 1;86(4):839-43
- 342 21. Baker J, Schorer J. The Southpaw Advantage?-Lateral Preference in Mixed Martial Arts. *Plos*  
343 *One*. 2013 Nov 19;8(11):e79793
- 344 22. Dochtermann NA, Gienger CM, Zappettini S. Born to win? Maybe, but perhaps only against  
345 inferior competition. *Animal Behaviour*. 2014(96):e1-3
- 346 23. Pollet TV, Riegman BR. Opponent left-handedness does not affect fight outcomes for Ultimate  
347 Fighting Championship hall of famers. *Frontiers in psychology*. 2014 Apr 30;5:375

- 348 24. Ziyagil MA, Gursoy R, Dane Ş, Yuksel R. Left-handed wrestlers are more successful.  
349 Perceptual and motor skills. 2010 Aug;111(1):65-70
- 350 25. Tirp J, Baker J, Weigelt M, Schorer J. Combat stance in judo—Laterality differences between  
351 and within competition levels. International Journal of Performance Analysis in Sport. 2014 Apr  
352 1;14(1):217-24
- 353 26. Cingoz YE, Gursoy R, Ozan M, Hazar K, Dalli M. Research on the Relation between Hand  
354 Preference and Success in Karate and Taekwondo Sports with Regards to Gender. Advances  
355 in Physical Education. 2018 Aug 1;8(03):308
- 356 27. Aggleton JP, Wood CJ. Is there a left-handed advantage in "ballistic" sports?. International  
357 Journal of Sport Psychology. 1990 Jan
- 358 28. Grouios G, Tsorbatzoudis H, Alexandris K, Barkoukis V. Do left-handed competitors have an  
359 innate superiority in sports?. Perceptual and motor skills. 2000 Jun;90(3\_suppl):1273-82
- 360 29. Hagemann N. The advantage of being left-handed in interactive sports. Attention, Perception, &  
361 Psychophysics. 2009 Oct 1;71(7):1641-8
- 362 30. Loffing F, Schorer J, Hagemann N, Baker J. On the advantage of being left-handed in volleyball:  
363 further evidence of the specificity of skilled visual perception. Attention, Perception, &  
364 Psychophysics. 2012 Feb 1;74(2):446-53
- 365 31. Loffing F, Hagemann N, Schorer J, Baker J. Skilled players' and novices' difficulty anticipating  
366 left-vs. right-handed opponents' action intentions varies across different points in time. Human  
367 movement science. 2015 Apr 1;40:410-21
- 368 32. Marzoli D, Lucafò C, Pagliara A, Cappuccio R, Brancucci A, Tommasi L. Both right-and left-  
369 handers show a bias to attend others' right arm. Experimental brain research. 2015 Feb  
370 1;233(2):415-24
- 371 33. Loffing F, Hagemann N. Pushing through evolution? Incidence and fight records of left-oriented  
372 fighters in professional boxing history. Laterality: Asymmetries of Body, Brain and Cognition.  
373 2015 May 4;20(3):270-86
- 374 34. Team RC. R: A language and environment for statistical computing
- 375 35. McGraw KO, Wong SP. A common language effect size statistic. Psychological bulletin. 1992  
376 Mar;111(2):361

- 377 36. Vargha A, Delaney HD. A critique and improvement of the CL common language effect size  
378 statistics of McGraw and Wong. *Journal of Educational and Behavioral Statistics*. 2000  
379 Jun;25(2):101-32
- 380 37. DiCiccio TJ, Efron B. Bootstrap confidence intervals. *Statistical science*. 1996 Aug 1:189-212  
381



382

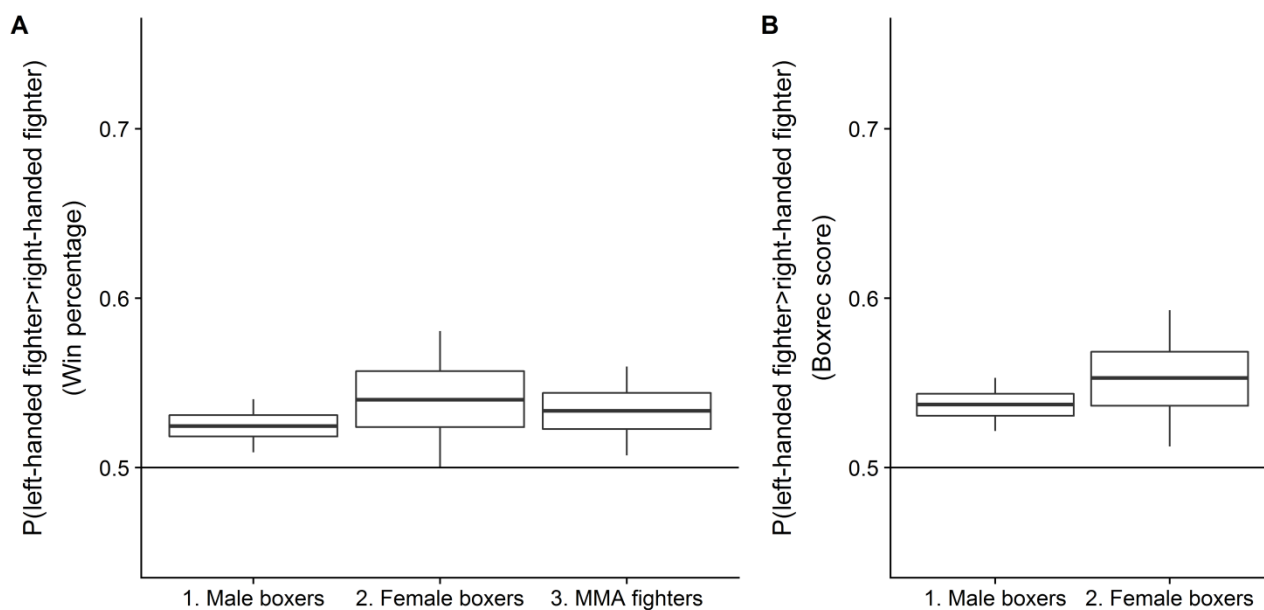

383

384

385

386

387

Figure 1: The probability that a randomly selected left-hander showed a higher (A) win percentage and (B) BoxRec score than a randomly selected right-hander. Boxes indicate 50% and whiskers indicate 90% bootstrapped confidence intervals (5000 samples).

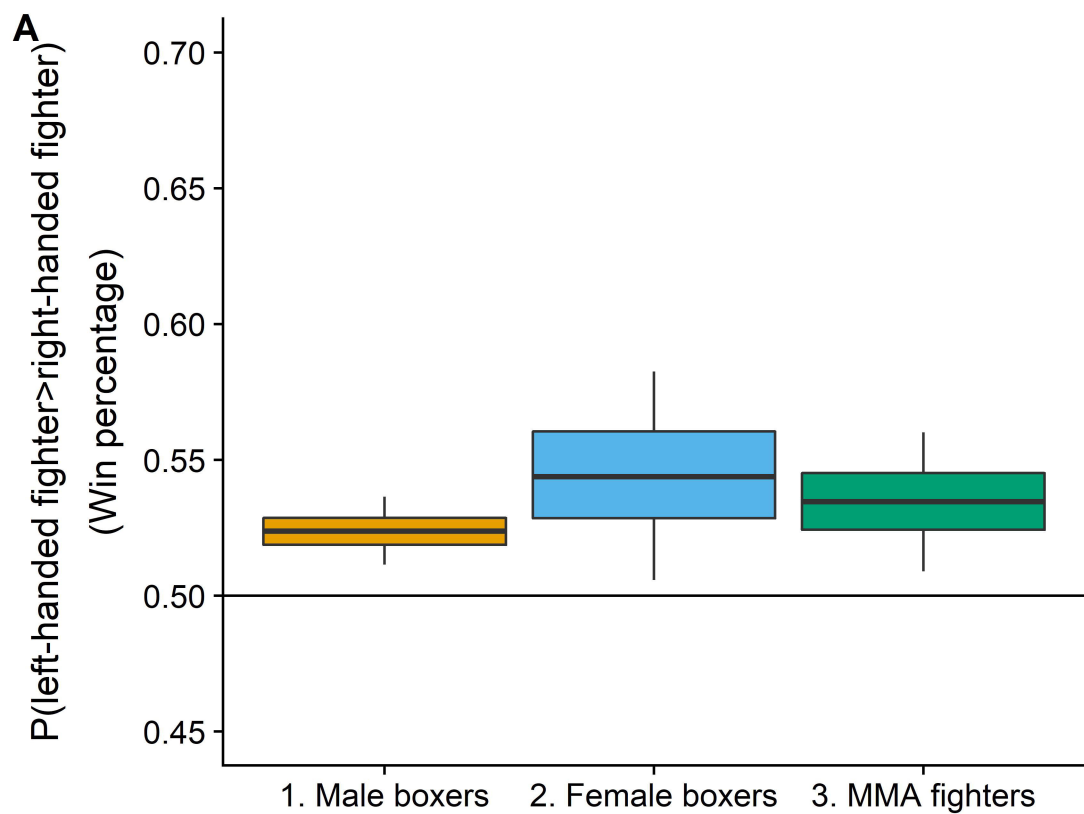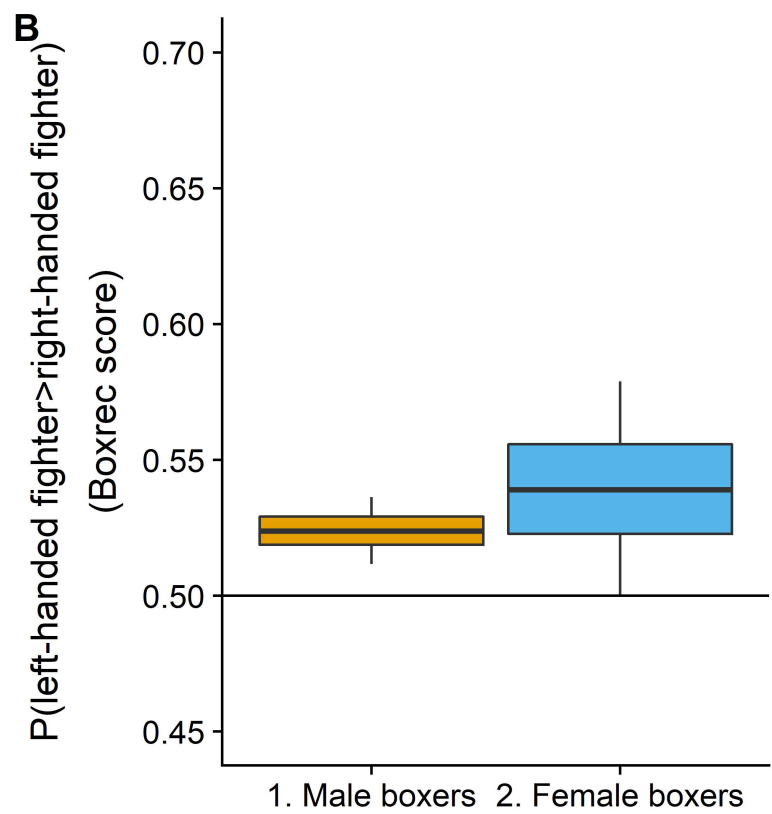

Source: https://www.biorxiv.org/content/10.1101/555912v3.full.pdf
